# Supplementary material
Source: Springer Nature journal article supplement (https://www.springermedizin.de/resource/supplementary/13075_2009_3014_MOESM10_ESM.pdf/9693346)

A

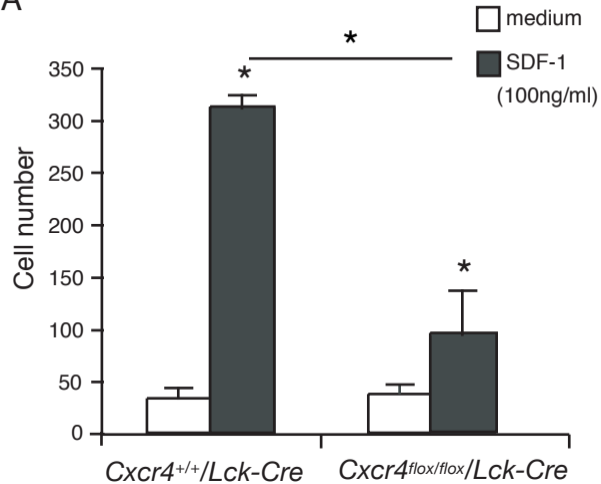

B

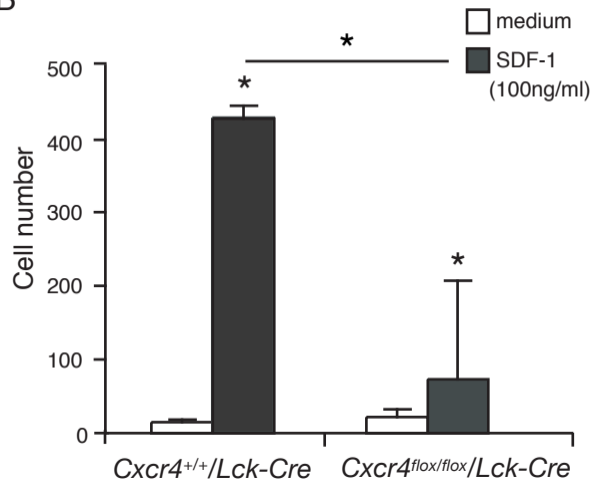

Supplement: MOESM10 [file 9693346]
